# Supplementary material
Source: Springer Nature journal article supplement (https://www.springermedizin.de/resource/supplementary/12943_2013_1236_MOESM9_ESM.pdf/9552680)

Figure 5

**A**

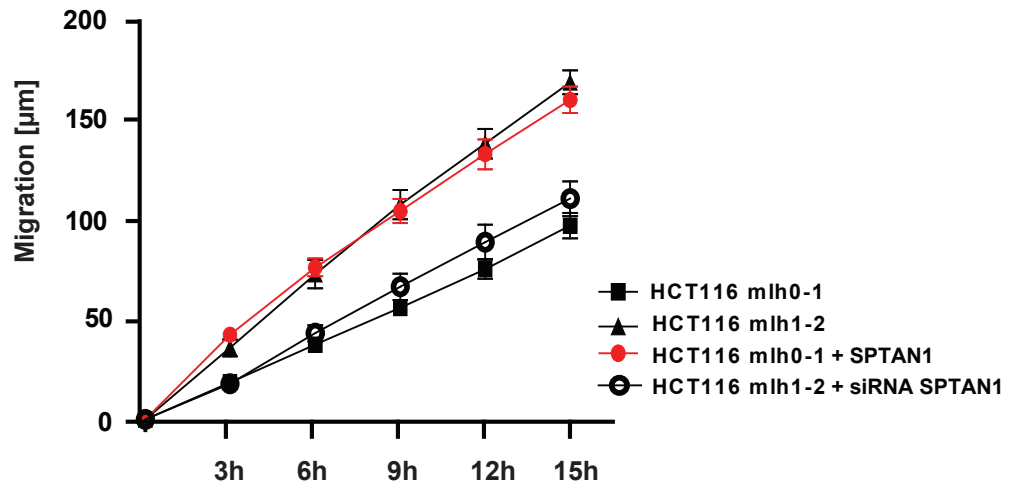

**B**

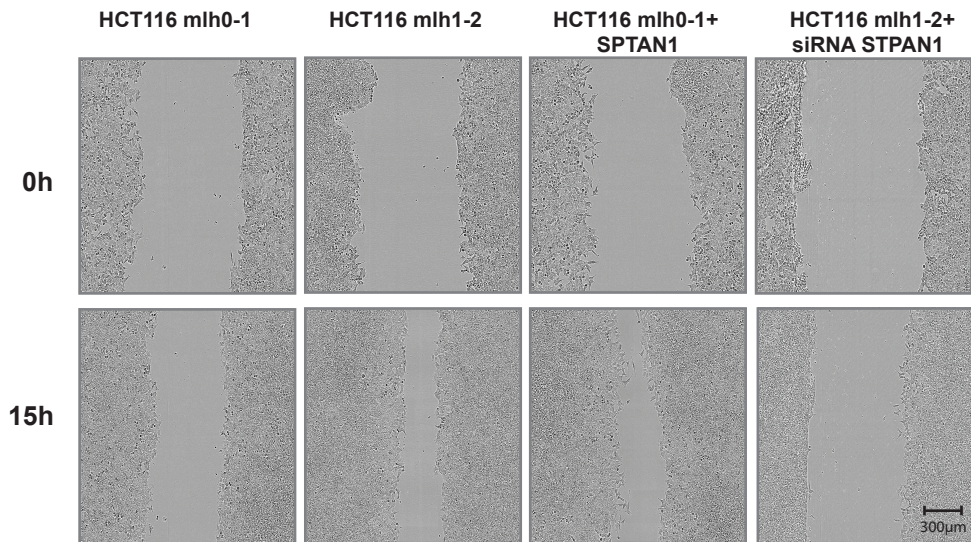

Supplement: MOESM9 [file 9552680]
